# Supplementary material for: Iron is a centrally bound cofactor of specifier proteins involved in glucosinolate breakdown
Source: PubMed Central journal article supplement (PMC6218027; doi:10.1371/journal.pone.0205755), 2018-11-05
Supplement: pone.0205755.s001.pdf [file pone.0205755.s001.pdf]

## Iron is a centrally bound cofactor of specifier proteins involved in glucosinolate breakdown

Anita Backenköhler, Daniela Eisenschmidt, Nicola Schneegans, Matthias Strieker, Wolfgang Brandt, and Ute Wittstock

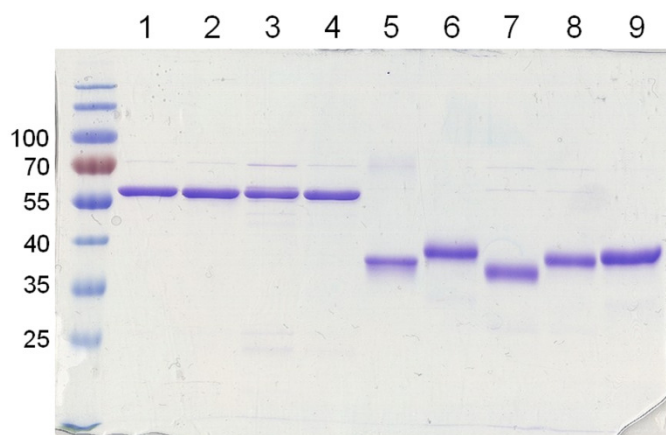

### S1 Fig. SDS-PAGE analysis of purified recombinant proteins used in this study.

Coomassie-stained 10.5 % SDS-polyacrylamide gels with 2  $\mu$ g protein per lane. 1, AtNSP3; 2, AtNSP3 E386Q; 3, AtNSP3 D390N; 4, AtNSP3 H394A; 5, AtESP; 6, TaTFP; 7, TaTFP E266Q; 8, TaTFP D270N; 9, TaTFP H274G.
