# Supplementary material for: Iron is a centrally bound cofactor of specifier proteins involved in glucosinolate breakdown
Source: PubMed Central journal article supplement (PMC6218027; doi:10.1371/journal.pone.0205755), 2018-11-05
Supplement: pone.0205755.s002.pdf [file pone.0205755.s002.pdf]

## Iron is a centrally bound cofactor of specifier proteins involved in glucosinolate breakdown

Anita Backenköhler, Daniela Eisenschmidt, Nicola Schneegans, Matthias Strieker, Wolfgang Brandt, and Ute Wittstock

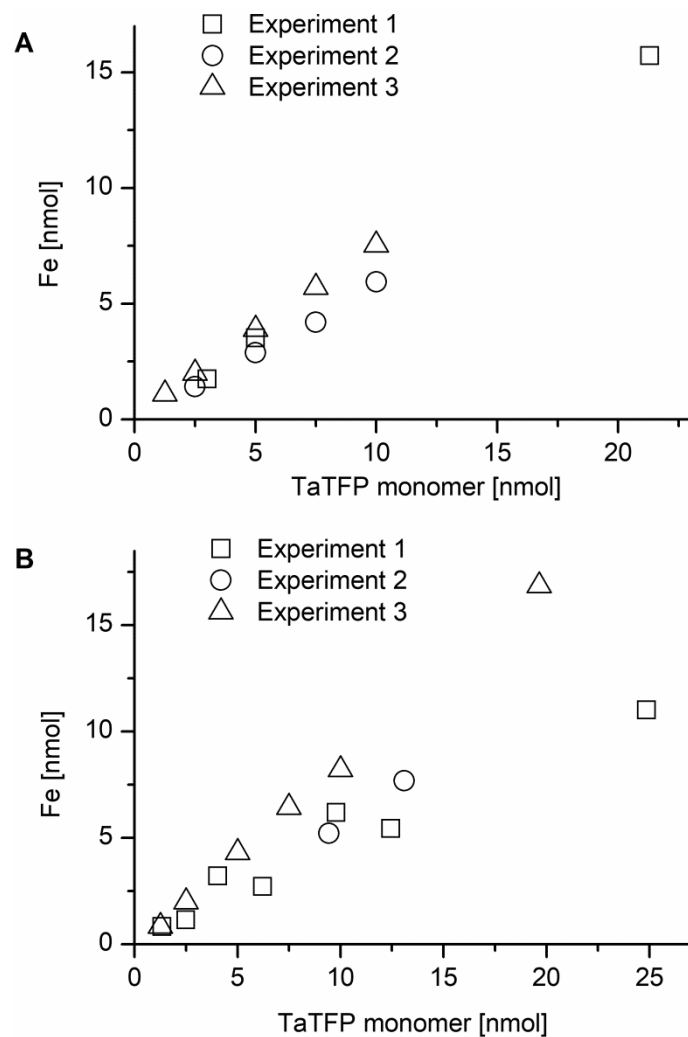

**S2 Fig. Linearity of iron determinations of TaTFP.** Different amounts of TaTFP (in 37.5 mM sodium acetate buffer, pH 5, with 6.25 % (w/v) sucrose) were denatured and precipitated. (A)  $\text{Fe}^{2+}$  in the supernatant was quantified colorimetrically using Ferene S reagent and calibration with  $(\text{NH}_4)_2\text{Fe}(\text{SO}_4)_2$ . (B) Iron in the supernatant was quantified by ICP-MS based on calibration with Iron ICP Standard. Each panel shows the results of three independent expression experiments.
