# Supplementary material for: Iron is a centrally bound cofactor of specifier proteins involved in glucosinolate breakdown
Source: PubMed Central journal article supplement (PMC6218027; doi:10.1371/journal.pone.0205755), 2018-11-05
Supplement: pone.0205755.s003.pdf [file pone.0205755.s003.pdf]

## Iron is a centrally bound cofactor of specifier proteins involved in glucosinolate breakdown

Anita Backenköhler, Daniela Eisenschmidt, Nicola Schneegans, Matthias Strieker, Wolfgang Brandt, and Ute Wittstock

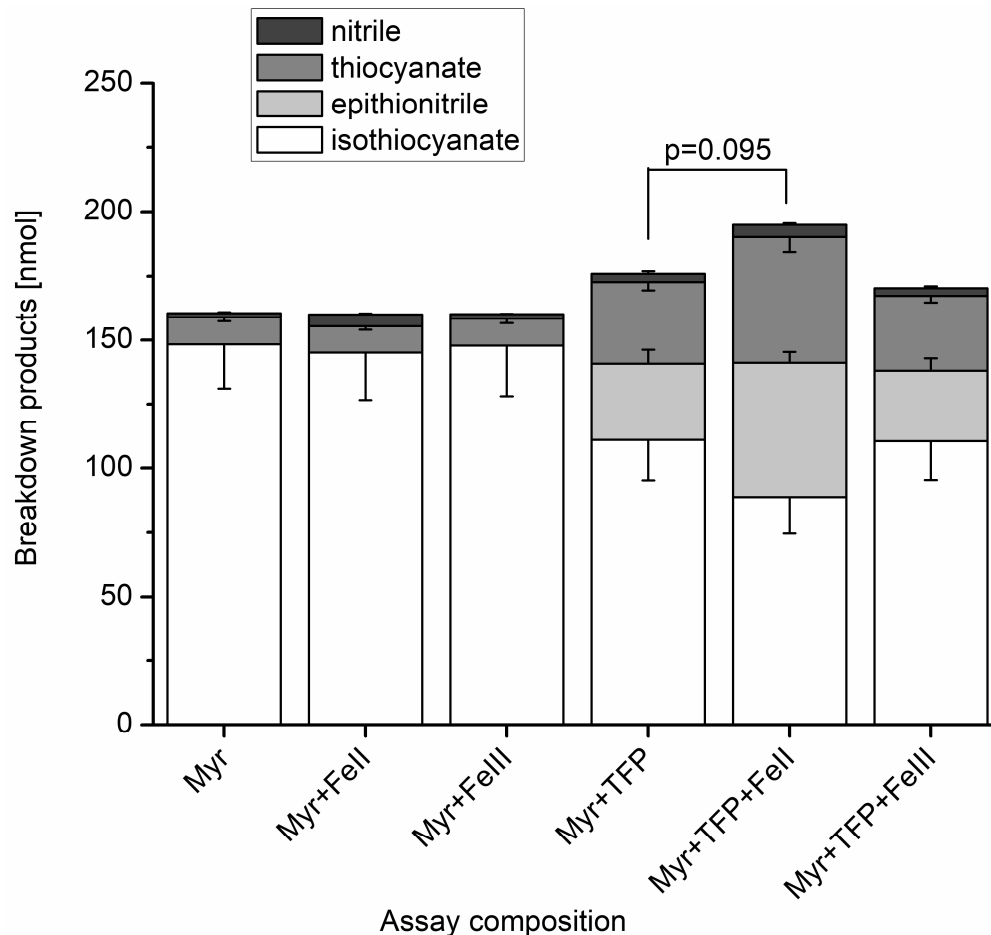

### S3 Fig. Impact of Fe<sup>2+</sup> and Fe<sup>3+</sup> on product formation by myrosinase and TaTFP.

Purified TaTFP was incubated with allylglucosinolate and myrosinase in 50 mM MES buffer, pH 6.0, with or without 0.01 mM Fe<sup>2+</sup> (FeII, (NH<sub>4</sub>)<sub>2</sub>Fe(SO<sub>4</sub>)<sub>2</sub>) or 0.01 mM Fe<sup>3+</sup> (FeIII, NH<sub>4</sub>Fe(SO<sub>4</sub>)<sub>2</sub>) for 40 min. The amount of breakdown products is given in nmol per reaction. Shown are means ± SD of N=5 independent expression experiments. The p value is given for a pairwise comparison of total amounts of product (Mann-Whitney test as errors were found to be non-normal).
