# Supplementary material for: Iron is a centrally bound cofactor of specifier proteins involved in glucosinolate breakdown
Source: PubMed Central journal article supplement (PMC6218027; doi:10.1371/journal.pone.0205755), 2018-11-05
Supplement: pone.0205755.s005.pdf [file pone.0205755.s005.pdf]

## Iron is a centrally bound cofactor of specifier proteins involved in glucosinolate breakdown

Anita Backenköhler, Daniela Eisenschmidt, Nicola Schneegans, Matthias Strieker, Wolfgang Brandt, and Ute Wittstock

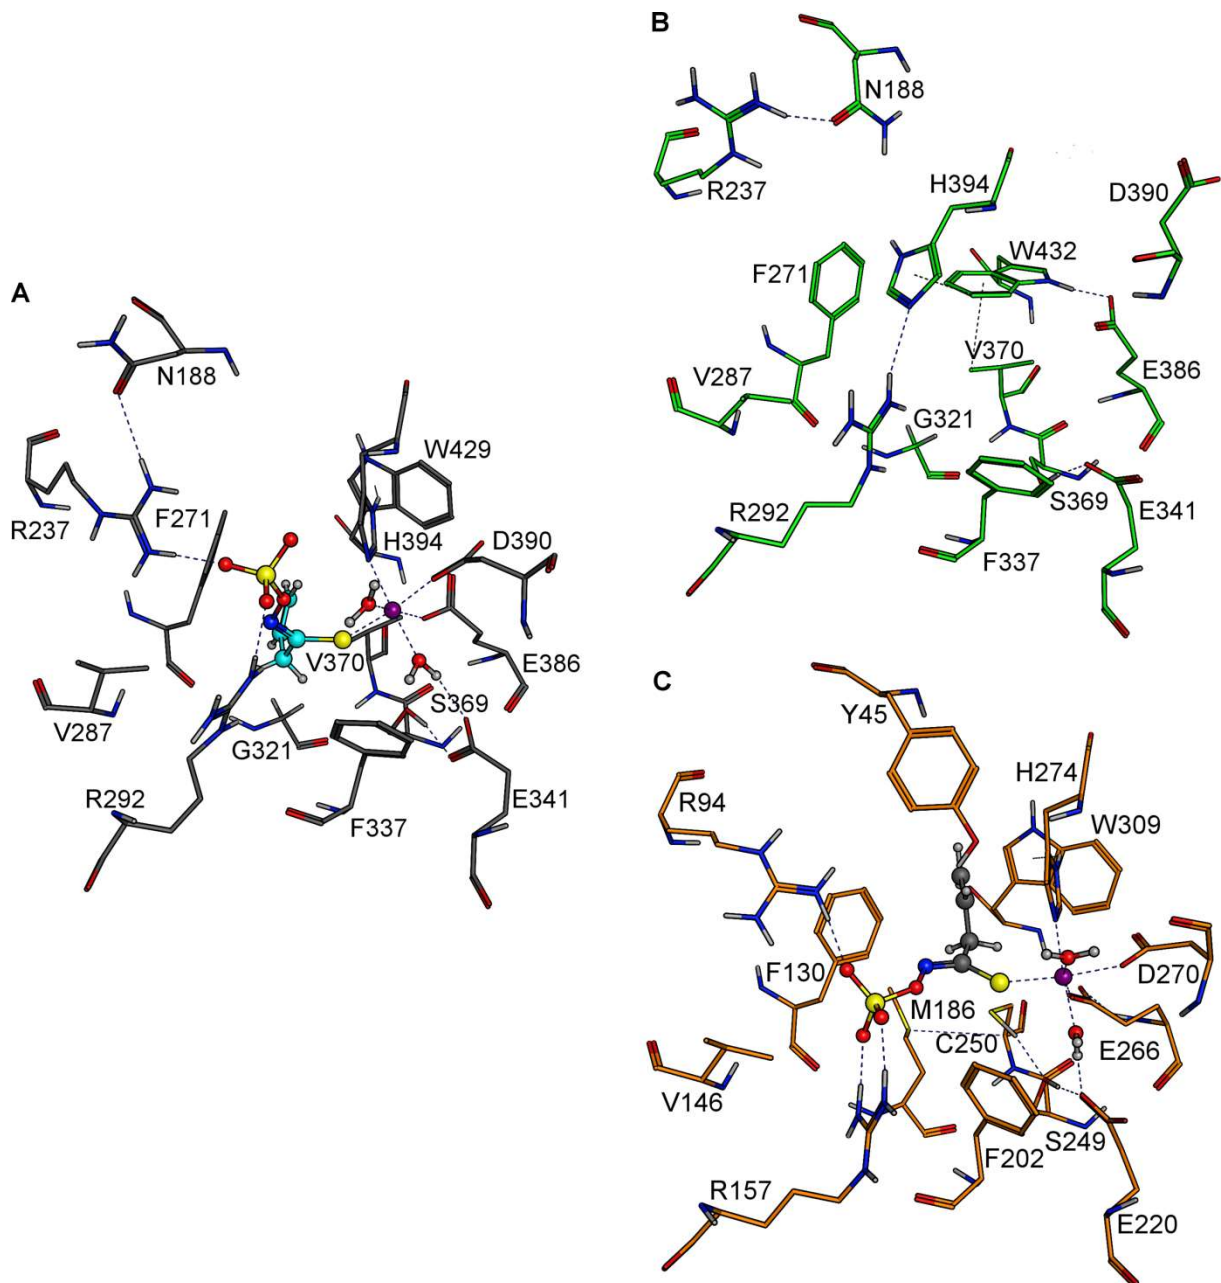

**S5 Fig. Active site of AtNSP3 in comparison with those of TaTFP and AtNSP1. (A)**

Model of the AtNSP3 active site with docked Fe<sup>2+</sup> and allylglucosinolate aglucone. (B)

AtNSP1 active site as represented in the crystal structure (PDB 5GQT, [36]). (C) TaTFP

active site with docked  $\text{Fe}^{2+}$  and allylglucosinolate aglucone [34] derived from the crystal structure (PDB 5A10). An alignment of the three amino acid sequences is provided in S4 Fig.
