# Supplementary material for: Iron is a centrally bound cofactor of specifier proteins involved in glucosinolate breakdown
Source: PubMed Central journal article supplement (PMC6218027; doi:10.1371/journal.pone.0205755), 2018-11-05
Supplement: pone.0205755.s006.pdf [file pone.0205755.s006.pdf]

## Iron is a centrally bound cofactor of specifier proteins involved in glucosinolate breakdown

Anita Backenköhler, Daniela Eisenschmidt, Nicola Schneegans, Matthias Strieker, Wolfgang Brandt, and Ute Wittstock

**S1 Table. Model quality of AtNSP3 evaluated with PROCHECK.** Main chain parameters comprises the overall Ramachandran plot quality, peptide bond planarity, hydrogen bond energy, bad non-bonded interactions, and G-factor. Side chain parameters comprises chi1 and chi2 dihedrals.

| PROCHECK parameter      | Evaluation result                                                                                 |
|-------------------------|---------------------------------------------------------------------------------------------------|
| Ramachandran Plot       | 86.8 % most favored<br>12.4 % additionally allowed<br>0.5 % generally allowed<br>0.3 % disallowed |
| Main chain parameters   | 5 better, 1 inside, 0 worse                                                                       |
| Side chain parameters   | 5 better, 0 insider, 0 worse                                                                      |
| Main chain Bond lengths | 100.0 % within limits                                                                             |
| Main chain bond angles  | 92.6 % within limits, 7.4 % highlighted                                                           |
| Planar groups           | 91.3 % within limits, 8.7 % highlighted                                                           |
