# Supplementary material for: Iron is a centrally bound cofactor of specifier proteins involved in glucosinolate breakdown
Source: PubMed Central journal article supplement (PMC6218027; doi:10.1371/journal.pone.0205755), 2018-11-05
Supplement: pone.0205755.s007.pdf [file pone.0205755.s007.pdf]

**Iron is a centrally bound cofactor of specifier proteins involved in glucosinolate breakdown**

Anita Backenköhler, Daniela Eisenschmidt, Nicola Schneegans, Matthias Strieker, Wolfgang Brandt, and Ute Wittstock

**S2 Table. Evaluation of GOLD docking poses obtained with AtNSP3, Fe<sup>2+</sup> and allylglucosinolate aglucone.** The ten poses with lowest AtNSP3-aglucone interaction energies are included. Fulfillment of the three essential docking criteria is indicated.

| Pose | Interaction energy (kJ mol <sup>-1</sup> ) | Aglucone-Fe <sup>2+</sup> coordination | Sulfate group stabilization | Side chain interaction |
|------|--------------------------------------------|----------------------------------------|-----------------------------|------------------------|
| 1    | -473.63                                    | thiolate (S <sup>-</sup> )             | -                           | H394, F271             |
| 2    | -463.17                                    | thiolate (S <sup>-</sup> )             | -                           | H394, F271             |
| 3    | -348.11                                    | thiolate (S <sup>-</sup> )             | R237                        | -                      |
| 4    | -340.99                                    | thiolate (S <sup>-</sup> )             | R237                        | -                      |
| 5    | -340.99                                    | thiolate (S <sup>-</sup> )             | R237                        | -                      |
| 6    | -338.49                                    | thiolate (S <sup>-</sup> )             | R237, R292                  | -                      |
| 7    | -336.39                                    | sulfate                                | R237                        | -                      |
| 8    | -335.56                                    | thiolate (S <sup>-</sup> )             | R237, R292                  | H394, F271             |
| 9    | -333.05                                    | thiolate (S <sup>-</sup> )             | R237, R292                  | H394, F271             |
| 10   | -333.05                                    | thiolate (S <sup>-</sup> )             | R237                        | F271                   |
